# Supplementary material for: Simulating the effect of a triple bond to achieve the shortest main group metal–metal distance in diberyllium complexes: a computational study
Source: Royal Society of Chemistry journal article supplement (doi:10.1039/c8dt02683a), 2018-01-01
Supplement: c8dt02683a1.pdf [file c8dt02683a1.pdf]

Electronic Supplementary Information

## Simulating the effect of triple bond to achieve the shortest main group metal–metal distance in diberyllium complexes: a computational study

Xue-Feng Zhao,<sup>a</sup> Caixia Yuan,<sup>a</sup> Si-Dian Li,<sup>a</sup> Yan-Bo Wu,<sup>a,\*</sup> Xiaotai Wang<sup>a,b,\*</sup>

<sup>a</sup> Key Laboratory of Materials for Energy Conversion and Storage of Shanxi Province, Institute of Molecular Science, Shanxi University, Taiyuan, 030006, People's Republic of China.

<sup>b</sup> Department of Chemistry, University of Colorado Denver, Campus Box 194, P.O. Box 173364, Denver, Colorado 80217-3364, United States.

\*To whom correspondence should be addressed.

E-mail: [wyb@sxu.edu.cn](mailto:wyb@sxu.edu.cn) (Y.B.W.) or [xiaotai.wang@ucdenver.edu](mailto:xiaotai.wang@ucdenver.edu) (X.W.)

### Contents

|                                                                                                                                                                                                                                                                    |     |
|--------------------------------------------------------------------------------------------------------------------------------------------------------------------------------------------------------------------------------------------------------------------|-----|
| <b>Fig. S1.</b> AdNDP-generated orbitals (two phases shown in red/white or green/white) related to bonding to beryllium in <b>4–10</b> .....                                                                                                                       | P2  |
| <b>Fig. S2.</b> B3LYP/BS1-optimized structures for <b>3–10</b> and their lowest isomers. The relative free energies (kcal/mol) were calculated using CCSD(T)/BS1 electronic energies plus B3LYP/BS1 Gibbs free energy corrections.....                             | P3  |
| <b>Fig. S3.</b> B3LYP/BS1-optimized neutral free radical $[\text{NH}_3 \rightarrow \text{Be}_2\text{H}_3 \leftarrow \text{NH}_3]$ with Be–Be distances, other interatomic distances, and NBO charges given in red, black, and italic blue fonts, respectively..... | P4  |
| CCSD(T)/BS1-optimized structures (in Cartesian coordinates) for <b>1–10</b> .....                                                                                                                                                                                  | P5  |
| B3LYP/BS1-optimized structures (in Cartesian coordinates) for <b>11</b> .....                                                                                                                                                                                      | P8  |
| B3LYP/BS1-optimized structures (in Cartesian coordinates) for isomers shown in Fig. S2.....                                                                                                                                                                        | P10 |

**Fig. S1.** AdNDP-generated orbitals (two phases shown in red/white or green/white) related to bonding to beryllium in 4–10

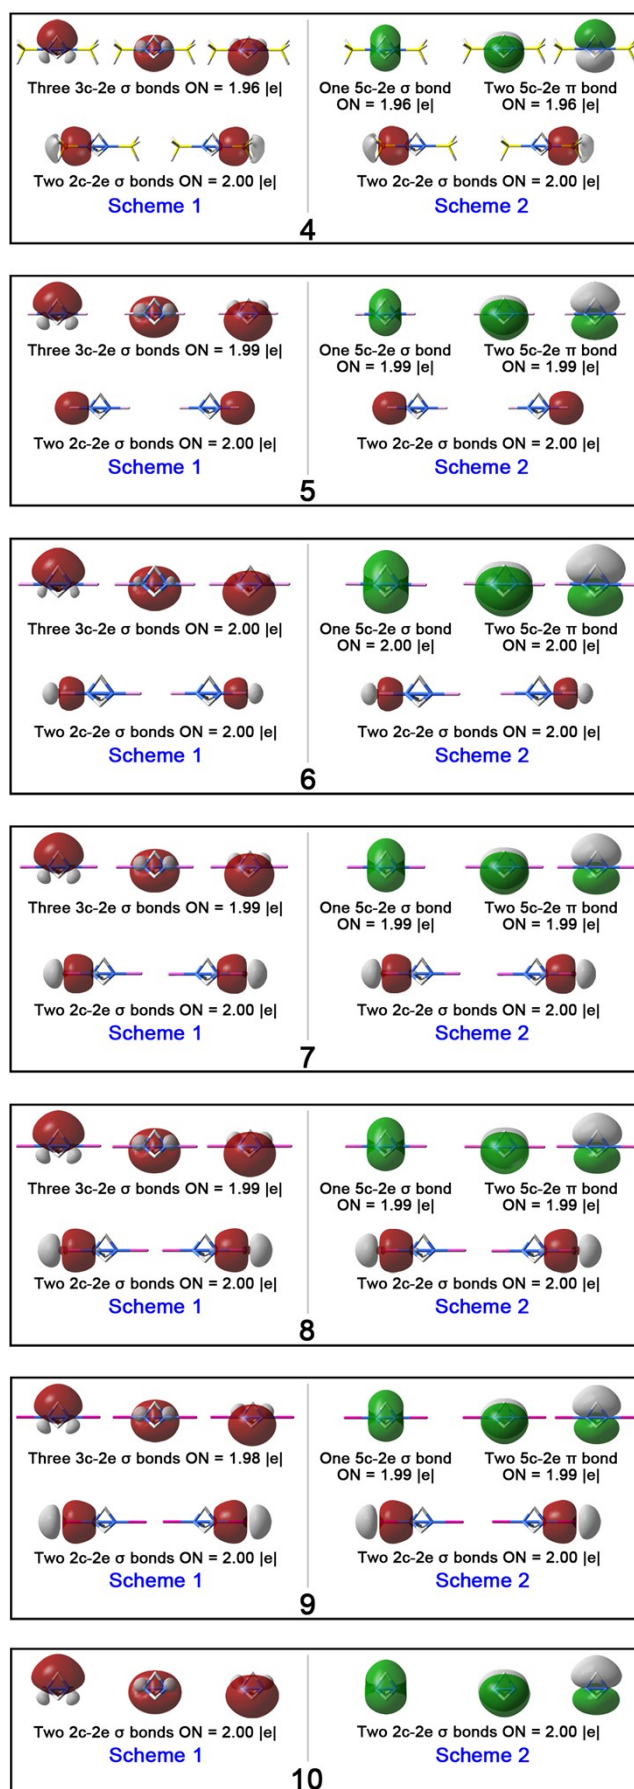

**Fig. S2.** B3LYP/BS1-optimized structures for **3–10** and their lowest isomers. The relative free energies (kcal/mol) were calculated using CCSD(T)/BS1 electronic energies plus B3LYP/BS1 Gibbs free energy corrections.

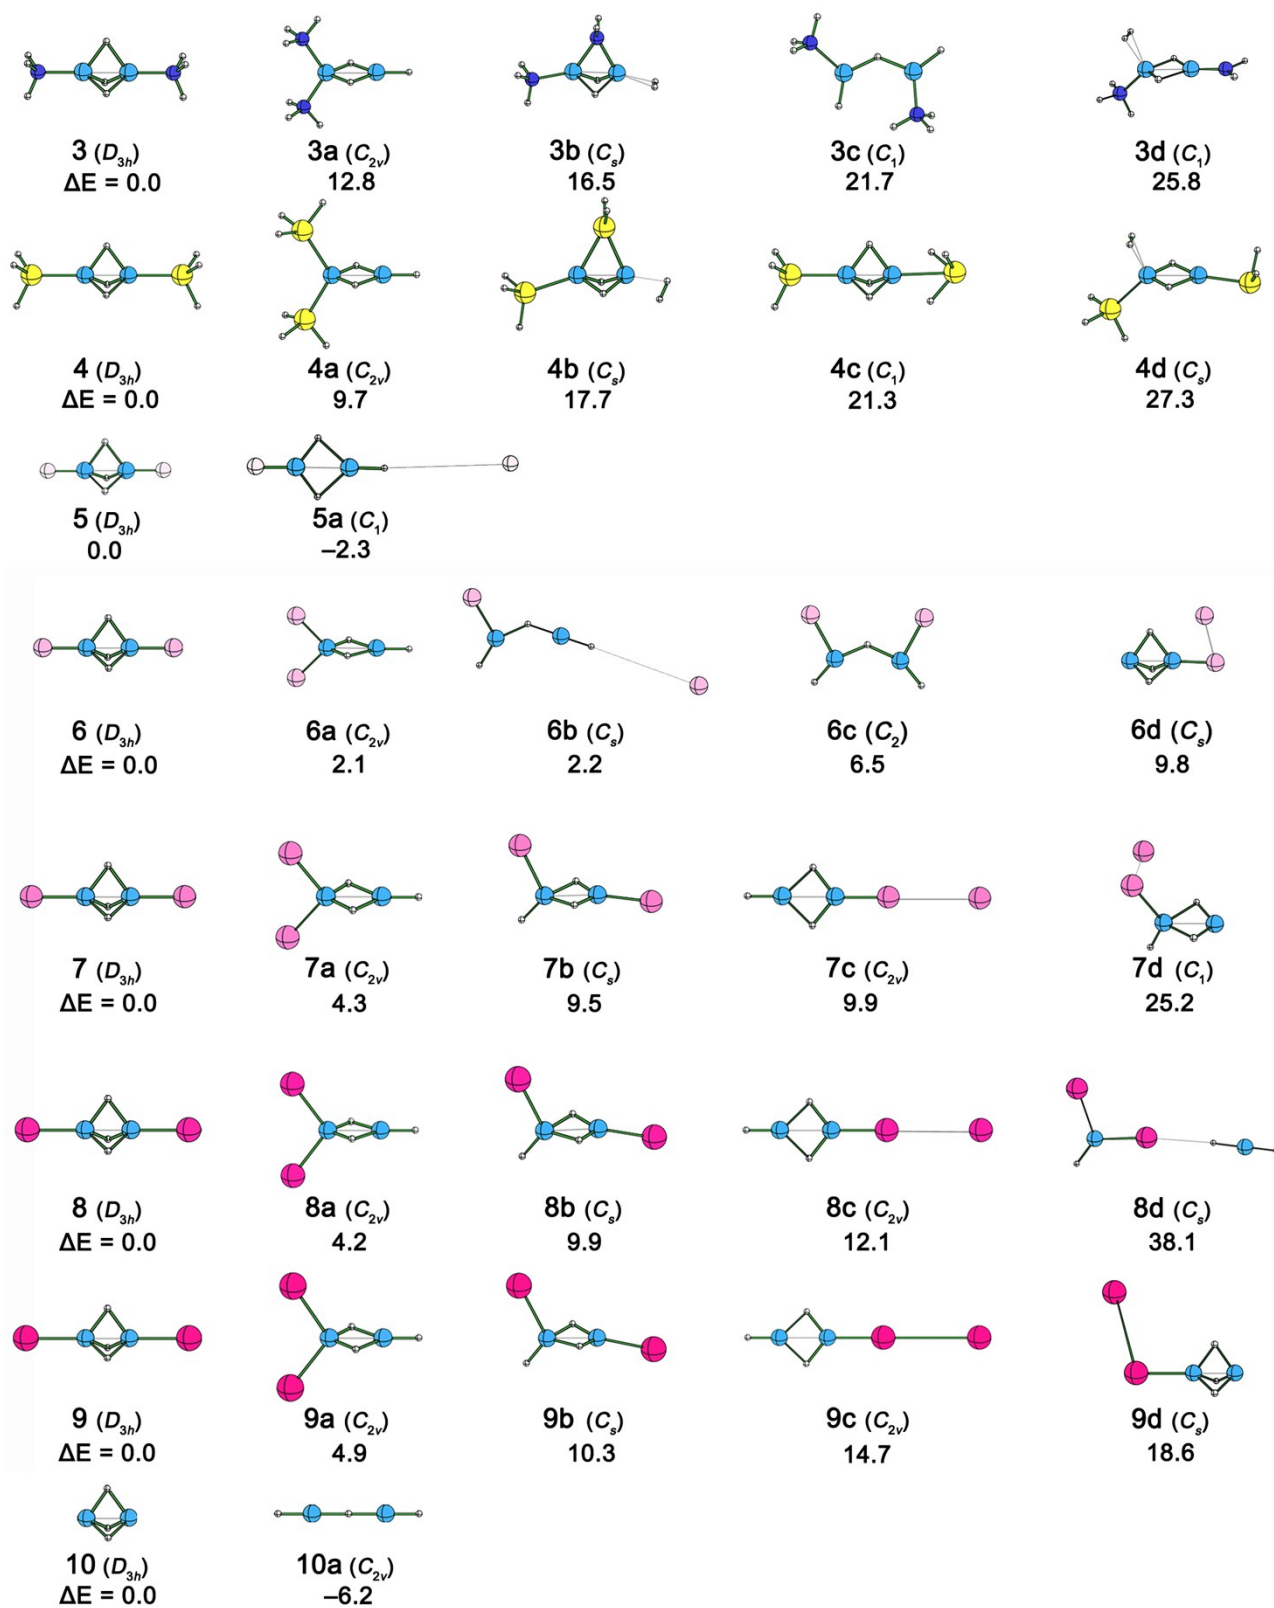

**Fig. S3.** B3LYP/BS1-optimized neutral free radical  $[\text{NH}_3 \rightarrow \text{Be}_2\text{H}_3 \leftarrow \text{NH}_3]$  with Be–Be distances, other interatomic distances, and NBO charges given in red, black, and italic blue fonts, respectively.

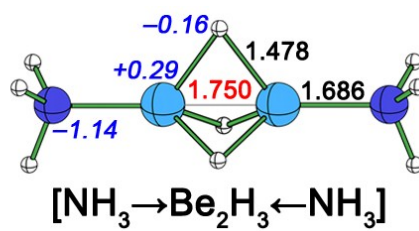

CCSD(T)/BS1-optimized structures (in Cartesian coordinates) for 1–10.

**1**

|    |               |               |               |
|----|---------------|---------------|---------------|
| Be | 0.000000000   | 0.8955577032  | -0.0264642700 |
| Be | 0.000000000   | -0.8955577032 | -0.0264642700 |
| H  | 1.0377347228  | 0.000000000   | -0.7417433520 |
| H  | -1.0377347228 | 0.000000000   | -0.7417433520 |
| N  | 0.000000000   | -2.5549356335 | -0.5375099176 |
| H  | 0.8153918192  | -3.0228991818 | -0.1564559664 |
| H  | -0.8153918192 | -3.0228991818 | -0.1564559664 |
| N  | 0.000000000   | 2.5549356335  | -0.5375099176 |
| H  | -0.8153918192 | 3.0228991818  | -0.1564559664 |
| H  | 0.8153918192  | 3.0228991818  | -0.1564559664 |
| H  | 0.000000000   | -2.6857207339 | -1.5436327867 |
| H  | 0.000000000   | 2.6857207339  | -1.5436327867 |
| C  | 0.000000000   | 0.000000000   | 1.4681863205  |
| H  | -0.8950994017 | 0.000000000   | 2.1003880988  |
| H  | 0.8950994017  | 0.000000000   | 2.1003880988  |

**2**

|    |               |               |               |
|----|---------------|---------------|---------------|
| Be | 0.000000000   | 0.8828906866  | 0.0432313685  |
| Be | 0.000000000   | -0.8828906866 | 0.0432313685  |
| P  | 0.000000000   | 2.9918109560  | -0.3477244998 |
| H  | -1.0698477671 | 3.6757224501  | 0.2506584648  |
| H  | 1.0698477671  | 3.6757224501  | 0.2506584648  |
| H  | 0.000000000   | 3.6315474575  | -1.6045077464 |
| P  | 0.000000000   | -2.9918109560 | -0.3477244998 |
| H  | 0.000000000   | -3.6315474575 | -1.6045077464 |
| H  | 1.0698477671  | -3.6757224501 | 0.2506584648  |
| H  | -1.0698477671 | -3.6757224501 | 0.2506584648  |
| H  | 1.0256381008  | 0.000000000   | -0.6619305494 |
| H  | -1.0256381008 | 0.000000000   | -0.6619305494 |
| C  | 0.000000000   | 0.000000000   | 1.5441335232  |
| H  | 0.8964220335  | 0.000000000   | 2.1702967360  |
| H  | -0.8964220335 | 0.000000000   | 2.1702967360  |

**3**

|    |               |               |               |
|----|---------------|---------------|---------------|
| Be | 0.000000000   | -0.0004374572 | 0.8675467691  |
| Be | 0.000000000   | -0.0004374572 | -0.8675467691 |
| H  | -1.0330192348 | 0.5978618856  | 0.000000000   |
| H  | 0.000000000   | -1.1943092702 | 0.000000000   |
| H  | 1.0330192348  | 0.5978618856  | 0.000000000   |

|   |               |               |               |
|---|---------------|---------------|---------------|
| H | -0.8149453679 | -0.4705807417 | -2.9438010514 |
| H | 0.0000000000  | 0.9409878788  | -2.9436615704 |
| H | 0.8149453679  | -0.4705807417 | -2.9438010514 |
| H | 0.0000000000  | 0.9409878788  | 2.9436615704  |
| H | -0.8149453679 | -0.4705807417 | 2.9438010514  |
| H | 0.8149453679  | -0.4705807417 | 2.9438010514  |
| N | 0.0000000000  | -0.0000961936 | -2.5566286382 |
| N | 0.0000000000  | -0.0000961936 | 2.5566286382  |

#### 4

|    |               |               |               |
|----|---------------|---------------|---------------|
| Be | 0.0000000000  | 0.0000435551  | 0.8668167861  |
| Be | 0.0000000000  | 0.0000435551  | -0.8668167861 |
| H  | 1.0306236509  | 0.5944243318  | 0.0000000000  |
| H  | -1.0306236509 | 0.5944243318  | 0.0000000000  |
| H  | 0.0000000000  | -1.1896950863 | 0.0000000000  |
| H  | 0.0000000000  | 1.2604072995  | -3.6040953269 |
| H  | 1.0914526341  | -0.6300552595 | -3.6041237222 |
| H  | -1.0914526341 | -0.6300552595 | -3.6041237222 |
| H  | 1.0914526341  | -0.6300552595 | 3.6041237222  |
| H  | 0.0000000000  | 1.2604072995  | 3.6040953269  |
| H  | -1.0914526341 | -0.6300552595 | 3.6041237222  |
| P  | 0.0000000000  | 0.0000828758  | 2.9934910760  |
| P  | 0.0000000000  | 0.0000828758  | -2.9934910760 |

#### 5

|    |               |               |               |
|----|---------------|---------------|---------------|
| Be | 0.0000000000  | -0.0000013773 | 0.8446889781  |
| Be | 0.0000000000  | -0.0000013773 | -0.8446889781 |
| H  | 0.0000000000  | 1.1876879512  | 0.0000000000  |
| H  | -1.0285647579 | -0.5938439734 | 0.0000000000  |
| H  | 1.0285647579  | -0.5938439734 | 0.0000000000  |
| He | 0.0000000000  | 0.0000008752  | 2.3436293352  |
| He | 0.0000000000  | 0.0000008752  | -2.3436293352 |

#### 6

|    |               |               |               |
|----|---------------|---------------|---------------|
| Be | 0.0000000000  | 0.0000000000  | 0.8461028577  |
| Be | 0.0000000000  | 0.0000000000  | -0.8461028577 |
| H  | 0.0000000000  | 1.1884163908  | 0.0000000000  |
| H  | -1.0291987863 | -0.5942081954 | 0.0000000000  |
| H  | 1.0291987863  | -0.5942081954 | 0.0000000000  |
| Ne | 0.0000000000  | 0.0000000000  | 2.5732414979  |
| Ne | 0.0000000000  | 0.0000000000  | -2.5732414979 |

**7**

|    |               |               |               |
|----|---------------|---------------|---------------|
| Be | 0.000000000   | -0.000000000  | 0.8515932012  |
| Be | 0.000000000   | -0.000000000  | -0.8515932012 |
| H  | 0.000000000   | 1.1885134861  | 0.000000000   |
| H  | -1.0292828674 | -0.5942567430 | 0.000000000   |
| H  | 1.0292828674  | -0.5942567430 | 0.000000000   |
| Ar | 0.000000000   | -0.000000001  | 2.8864806615  |
| Ar | 0.000000000   | -0.000000001  | -2.8864806615 |

**8**

|    |               |               |               |
|----|---------------|---------------|---------------|
| Be | 0.000000000   | -0.0000049942 | 0.8537329773  |
| Be | 0.000000000   | -0.0000049942 | -0.8537329773 |
| H  | 0.000000000   | 1.1885913126  | 0.000000000   |
| H  | -1.0293718951 | -0.5942838213 | 0.000000000   |
| H  | 1.0293718951  | -0.5942838213 | 0.000000000   |
| Kr | 0.000000000   | -0.0000068407 | 3.0350374770  |
| Kr | 0.000000000   | -0.0000068407 | -3.0350374770 |

**9**

|    |               |               |               |
|----|---------------|---------------|---------------|
| Be | 0.000000000   | 0.000000000   | 0.8566143898  |
| Be | 0.000000000   | 0.000000000   | -0.8566143898 |
| H  | 0.000000000   | 1.1886036956  | 0.000000000   |
| H  | -1.0293609934 | -0.5943018478 | 0.000000000   |
| H  | 1.0293609934  | -0.5943018478 | 0.000000000   |
| Xe | 0.000000000   | 0.000000000   | 3.2254486773  |
| Xe | 0.000000000   | 0.000000000   | -3.2254486773 |

**10**

|    |               |               |               |
|----|---------------|---------------|---------------|
| Be | 0.000000000   | -0.0000004544 | 0.8415724692  |
| Be | 0.000000000   | -0.0000004544 | -0.8415724692 |
| H  | 0.000000000   | 1.1903007475  | 0.000000000   |
| H  | 1.0308283427  | -0.5951499194 | 0.000000000   |
| H  | -1.0308283427 | -0.5951499194 | 0.000000000   |

B3LYP/BS1-optimized structure (in Cartesian coordinates) for **11**.**11**

|    |             |             |             |
|----|-------------|-------------|-------------|
| Be | 0.00000000  | 0.00000000  | -0.87633289 |
| Be | 0.00000000  | 0.00000000  | 0.87683611  |
| H  | -0.48887680 | -1.08013729 | 0.00025311  |
| H  | -0.69098793 | 0.96344837  | 0.00025311  |
| H  | 1.17986473  | 0.11668892  | 0.00025311  |
| N  | 0.00000000  | 0.00000000  | 2.56775511  |
| N  | 0.00000000  | 0.00000000  | -2.56727289 |
| C  | -0.05523904 | 1.41834378  | -3.08853787 |
| C  | 1.08792619  | 2.32113438  | -2.64877090 |
| C  | -1.32576691 | 0.50707319  | 3.08900615  |
| C  | -2.54763585 | -0.28532700 | 2.64813318  |
| C  | 0.22374519  | -1.40168442 | 3.08900615  |
| C  | 1.52091835  | -2.06365386 | 2.64813318  |
| C  | 1.10202172  | 0.89461123  | 3.08900615  |
| C  | 1.02671749  | 2.34898086  | 2.64813318  |
| C  | 1.25594126  | -0.66133348 | -3.08853787 |
| C  | 1.46619825  | -2.10273891 | -2.64877090 |
| C  | -1.20070222 | -0.75701030 | -3.08853787 |
| C  | -2.55412443 | -0.21839548 | -2.64877090 |
| H  | -0.99345043 | 1.84121425  | -2.74328984 |
| H  | -0.09934829 | 1.36246031  | -4.17876787 |
| H  | 0.86430993  | 3.33577154  | -2.97526088 |
| H  | 1.19543792  | 2.34285781  | -1.56491590 |
| H  | 2.04353929  | 2.04540952  | -3.08754792 |
| H  | -1.42501861 | 1.53164005  | 2.74453116  |
| H  | -1.25906491 | 0.53010910  | 4.17926915  |
| H  | -3.43683782 | 0.25176476  | 2.97516821  |
| H  | -2.60258036 | -0.37877693 | 1.56415518  |
| H  | -2.59343074 | -1.27943647 | 3.08562717  |
| H  | -0.61392989 | -1.99992234 | 2.74453116  |
| H  | 0.17044451  | -1.35543674 | 4.17926915  |
| H  | 1.50038423  | -3.10227124 | 2.97516821  |
| H  | 1.62932062  | -2.06451225 | 1.56415518  |
| H  | 2.40473985  | -1.60625867 | 3.08562717  |
| H  | 2.03894850  | 0.46828229  | 2.74453116  |
| H  | 1.08862040  | 0.82532765  | 4.17926915  |
| H  | 1.93645359  | 2.85050648  | 2.97516821  |
| H  | 0.97325974  | 2.44328917  | 1.56415518  |
| H  | 0.18869088  | 2.88569513  | 3.08562717  |
| H  | 2.09126353  | -0.06025382 | -2.74328984 |
| H  | 1.22959938  | -0.59519201 | -4.17876787 |
| H  | 2.45670793  | -2.41640012 | -2.97526088 |



|   |             |             |             |
|---|-------------|-------------|-------------|
| H | 1.43125542  | -2.20670851 | -1.56491590 |
| H | 0.74960696  | -2.79246170 | -3.08754792 |
| H | -1.09781310 | -1.78096043 | -2.74328984 |
| H | -1.13025109 | -0.76726830 | -4.17876787 |
| H | -3.32101786 | -0.91937142 | -2.97526088 |
| H | -2.62669334 | -0.13614929 | -1.56491590 |
| H | -2.79314625 | 0.74705218  | -3.08754792 |

B3LYP/BS1-optimized structures (in Cartesian coordinates) for isomers shown in Figure S2. The free energies were calculated with CCSD(T)/BS1 electronic energies plus B3LYP/BS1 Gibbs free energy corrections.

### 3

Free energy = -143.9857192 a.u.

|    |             |             |             |
|----|-------------|-------------|-------------|
| Be | 0.00000000  | 0.00000000  | 0.86452000  |
| Be | -0.00000000 | 0.00000000  | -0.86452000 |
| H  | 1.02879467  | 0.59397488  | 0.00000000  |
| H  | -1.02879467 | 0.59397488  | 0.00000000  |
| H  | 0.00000000  | -1.18794976 | 0.00000000  |
| H  | 0.00000000  | 0.94185595  | -2.93712500 |
| H  | 0.81567118  | -0.47092797 | -2.93712500 |
| H  | -0.81567118 | -0.47092797 | -2.93712500 |
| H  | 0.81567118  | -0.47092797 | 2.93712500  |
| H  | 0.00000000  | 0.94185595  | 2.93712500  |
| H  | -0.81567118 | -0.47092797 | 2.93712500  |
| N  | 0.00000000  | 0.00000000  | -2.55060100 |
| N  | 0.00000000  | 0.00000000  | 2.55060100  |

### 3a

Free energy = -143.9652573 a.u.

|    |             |             |             |
|----|-------------|-------------|-------------|
| Be | 0.00000000  | 0.00000000  | 0.20084623  |
| Be | 0.00000000  | 0.00000000  | 2.20644123  |
| H  | -1.06691800 | 0.00000000  | 1.18431823  |
| H  | 0.00000000  | 2.27041800  | -0.09255277 |
| H  | 1.06691800  | 0.00000000  | 1.18431823  |
| H  | -0.81553400 | -1.58773500 | -1.31669477 |
| H  | 0.81553400  | 1.58773500  | -1.31669477 |
| H  | -0.81553400 | 1.58773500  | -1.31669477 |
| H  | 0.00000000  | 0.00000000  | 3.52148123  |
| H  | 0.81553400  | -1.58773500 | -1.31669477 |
| H  | 0.00000000  | -2.27041800 | -0.09255277 |
| N  | 0.00000000  | -1.46705200 | -0.71909877 |
| N  | -0.00000000 | 1.46705200  | -0.71909877 |

### 3b

Free energy = -143.9593683 a.u.

|    |            |             |             |
|----|------------|-------------|-------------|
| Be | 0.18862436 | 0.26129485  | 0.00000000  |
| Be | 0.64731162 | -1.44273989 | 0.00000000  |
| H  | 1.46159444 | -2.80049810 | 0.38331100  |
| H  | 1.46159444 | -2.80049810 | -0.38331100 |
| H  | 1.06209959 | 2.36194635  | 0.00000000  |

|   |             |             |             |
|---|-------------|-------------|-------------|
| H | -0.35094044 | 2.33066015  | 0.81514500  |
| H | -1.51437636 | -1.16435238 | 0.81786500  |
| H | 1.04360722  | -0.50472768 | 1.02550100  |
| H | -0.35094044 | 2.33066015  | -0.81514500 |
| H | -1.51437636 | -1.16435238 | -0.81786500 |
| H | 1.04360722  | -0.50472768 | -1.02550100 |
| N | 0.12905413  | 1.95274796  | 0.00000000  |
| N | -0.94128459 | -1.00393799 | 0.00000000  |

### 3c

Free energy = -143.9511622 a.u.

|    |             |             |             |
|----|-------------|-------------|-------------|
| Be | 1.32689411  | 1.02468016  | 0.00000000  |
| Be | -0.89167495 | -0.34648473 | 0.00000000  |
| H  | 2.92036306  | -0.37450886 | -0.80265892 |
| H  | 2.92036306  | -0.37450886 | 0.80265892  |
| H  | 1.77612601  | -1.25041386 | 0.00000000  |
| N  | -2.55185893 | 0.02373734  | 0.00000000  |
| H  | 1.79035317  | 2.26367914  | 0.00000000  |
| H  | -3.01236296 | -0.39806368 | 0.80785500  |
| H  | -2.78826889 | 1.01376935  | 0.00000000  |
| N  | 2.29450605  | -0.37194888 | 0.00000000  |
| H  | -3.01236296 | -0.39806368 | -0.80785500 |
| H  | -0.10851390 | 0.82747923  | 0.00000000  |
| H  | -0.41136501 | -1.59254475 | 0.00000000  |

### 3d

Free energy = -143.9445977 a.u.

|    |             |             |             |
|----|-------------|-------------|-------------|
| Be | 0.08692460  | -1.14120399 | 0.00000000  |
| Be | 0.42651675  | 0.80667067  | 0.00000000  |
| H  | 2.04684564  | 1.08055922  | 0.38205500  |
| H  | 0.28743191  | -0.08438481 | 1.07898400  |
| H  | -0.30381241 | -3.16770316 | 0.82100500  |
| H  | -0.23026337 | 2.86576742  | 0.81684000  |
| H  | -1.41447166 | 2.10778427  | 0.00000000  |
| H  | 0.28743191  | -0.08438481 | -1.07898400 |
| H  | -0.23026337 | 2.86576742  | -0.81684000 |
| H  | -0.30381241 | -3.16770316 | -0.82100500 |
| H  | 2.04684564  | 1.08055922  | -0.38205500 |
| N  | -0.40926604 | 2.28310204  | 0.00000000  |
| N  | -0.19640501 | -2.59140609 | 0.00000000  |

**4**

Free energy = -716.378781 a.u.

|    |             |             |             |
|----|-------------|-------------|-------------|
| Be | 0.00000000  | 0.00000000  | 0.86429500  |
| Be | -0.00000000 | 0.00000000  | -0.86429500 |
| H  | 1.02468870  | 0.59160430  | 0.00000000  |
| H  | -1.02468870 | 0.59160430  | 0.00000000  |
| H  | 0.00000000  | -1.18320860 | 0.00000000  |
| H  | 0.00000000  | 1.25896980  | -3.60592700 |
| H  | 1.09029983  | -0.62948490 | -3.60592700 |
| H  | -1.09029983 | -0.62948490 | -3.60592700 |
| H  | 1.09029983  | -0.62948490 | 3.60592700  |
| H  | 0.00000000  | 1.25896980  | 3.60592700  |
| H  | -1.09029983 | -0.62948490 | 3.60592700  |
| P  | 0.00000000  | -0.00000000 | 2.98977700  |
| P  | -0.00000000 | -0.00000000 | -2.98977700 |

**4a**

Free energy = -716.3633994 a.u.

|    |             |             |             |
|----|-------------|-------------|-------------|
| Be | 0.00000000  | 0.00000000  | 0.59887015  |
| Be | 0.00000000  | 0.00000000  | 2.59225215  |
| H  | -1.06538400 | 0.00000000  | 1.54423215  |
| H  | 0.00000000  | 3.01000800  | 0.31435415  |
| H  | 1.06538400  | 0.00000000  | 1.54423215  |
| P  | 0.00000000  | 1.86780100  | -0.49982685 |
| H  | -1.08739100 | -2.12453600 | -1.34820285 |
| H  | 1.08739100  | 2.12453600  | -1.34820285 |
| H  | -1.08739100 | 2.12453600  | -1.34820285 |
| P  | 0.00000000  | -1.86780100 | -0.49982685 |
| H  | 0.00000000  | 0.00000000  | 3.90595515  |
| H  | 1.08739100  | -2.12453600 | -1.34820285 |
| H  | 0.00000000  | -3.01000800 | 0.31435415  |

**4b**

Free energy = -716.3506237 a.u.

|    |             |             |            |
|----|-------------|-------------|------------|
| Be | -0.10700872 | 0.39045784  | 0.00000000 |
| Be | 1.48604465  | 1.33494165  | 0.00000000 |
| H  | 2.15509150  | 2.82102532  | 0.00000000 |
| H  | 2.74766344  | 2.33042462  | 0.00000000 |
| H  | -3.09755440 | 1.03063999  | 0.00000000 |
| P  | 1.71572446  | -0.70386939 | 0.00000000 |
| H  | -2.65671886 | -0.80759986 | 1.08943900 |
| H  | 2.19373947  | -1.39194065 | 1.11785400 |
| H  | 0.46081300  | 1.31374041  | 1.02460400 |
| P  | -2.20352522 | -0.05026979 | 0.00000000 |

|   |             |             |             |
|---|-------------|-------------|-------------|
| H | -2.65671886 | -0.80759986 | -1.08943900 |
| H | 2.19373947  | -1.39194065 | -1.11785400 |
| H | 0.46081300  | 1.31374041  | -1.02460400 |

#### 4c

Free energy = -716.3447922 a.u.

|    |             |             |             |
|----|-------------|-------------|-------------|
| Be | -0.87724400 | -0.02698000 | -0.00796700 |
| Be | 0.84844600  | -0.05800300 | -0.02375800 |
| H  | -3.63678400 | -0.94498700 | -0.79782000 |
| H  | 2.82771200  | 0.08378900  | 1.32827600  |
| H  | 0.01414100  | 0.85797100  | 0.74992100  |
| P  | 3.23360400  | 0.00505100  | -0.02877700 |
| H  | -3.60974300 | -0.19377100 | 1.25167700  |
| H  | 2.40644400  | 1.08822000  | -0.46333000 |
| H  | -0.01196900 | 0.16685700  | -1.17890300 |
| P  | -3.00165800 | 0.01171400  | 0.00573600  |
| H  | 2.27485700  | -1.01861900 | -0.37597600 |
| H  | -3.59744600 | 1.20536700  | -0.42390300 |
| H  | -0.03120700 | -1.15636900 | 0.38257700  |

#### 4d

Free energy = -716.3352825 a.u.

|    |             |             |             |
|----|-------------|-------------|-------------|
| Be | -0.40755238 | 1.08547565  | 0.00000000  |
| Be | -0.81793326 | -0.86875785 | 0.00000000  |
| H  | -2.40252820 | -1.12201721 | 0.38359100  |
| H  | -0.64185673 | 0.02131806  | 1.06874000  |
| H  | -0.45275807 | 3.45886763  | 1.06187500  |
| P  | 0.33735032  | 2.95653101  | 0.00000000  |
| H  | 0.15230754  | -3.54964961 | 1.09562900  |
| H  | 1.70451462  | -2.45991940 | 0.00000000  |
| H  | -0.64185673 | 0.02131806  | -1.06874000 |
| P  | 0.32178960  | -2.69146365 | 0.00000000  |
| H  | 0.15230754  | -3.54964961 | -1.09562900 |
| H  | -0.45275807 | 3.45886763  | -1.06187500 |
| H  | -2.40252820 | -1.12201721 | -0.38359100 |

#### 5

Free energy = -36.65279819 a.u.

|    |             |             |             |
|----|-------------|-------------|-------------|
| Be | -0.00000000 | -0.00000000 | 0.84077500  |
| Be | -0.00000000 | -0.00000000 | -0.84077500 |
| H  | 0.00000000  | 1.18096307  | 0.00000000  |
| H  | -1.02274402 | -0.59048153 | 0.00000000  |
| H  | 1.02274402  | -0.59048153 | 0.00000000  |

|    |             |             |             |
|----|-------------|-------------|-------------|
| He | -0.00000000 | -0.00000000 | 2.33144300  |
| He | -0.00000000 | -0.00000000 | -2.33144300 |

### 5a

Free energy = -36.65639099 a.u.

|    |             |             |             |
|----|-------------|-------------|-------------|
| Be | -0.16455100 | 0.23453100  | 0.17446400  |
| Be | 1.78957900  | -0.08665600 | -0.06008600 |
| H  | 0.85494700  | -1.01375800 | 0.30846200  |
| H  | -1.44157900 | 0.44583400  | 0.32670000  |
| H  | 1.13732600  | 1.10142000  | -0.23816900 |
| He | -6.78920200 | -0.23391900 | -0.18959600 |
| He | 3.26380100  | -0.32857900 | -0.23765800 |

### 6

Free energy = -288.5534524 a.u.

|    |             |             |             |
|----|-------------|-------------|-------------|
| Be | 0.00000000  | 0.00000000  | 0.84257400  |
| Be | -0.00000000 | 0.00000000  | -0.84257400 |
| H  | 0.00000000  | 1.18259600  | 0.00000000  |
| H  | -1.02415818 | -0.59129800 | 0.00000000  |
| H  | 1.02415818  | -0.59129800 | 0.00000000  |
| Ne | 0.00000000  | 0.00000000  | 2.57446500  |
| Ne | -0.00000000 | 0.00000000  | -2.57446500 |

### 6a

Free energy = -288.5501035 a.u.

|    |             |             |             |
|----|-------------|-------------|-------------|
| Be | 0.00000000  | 0.00000000  | 2.36076741  |
| Be | 0.00000000  | 0.00000000  | 0.37148180  |
| H  | -1.08962300 | 0.00000000  | 1.21502214  |
| H  | 0.00000000  | 0.00000000  | 3.66518894  |
| H  | 1.08962300  | 0.00000000  | 1.21502214  |
| Ne | 0.00000000  | 1.31466202  | -0.85121150 |
| Ne | 0.00000000  | -1.31466202 | -0.85121150 |

### 6b

Free energy = -288.5377976 a.u.

|    |             |             |            |
|----|-------------|-------------|------------|
| Be | -0.21598611 | -0.12809705 | 0.00000000 |
| Be | -2.68483205 | 0.81918007  | 0.00000000 |
| H  | -1.62956616 | -0.15434627 | 0.00000000 |
| H  | 1.08542352  | -0.12265995 | 0.00000000 |
| H  | -2.98816102 | 2.08377775  | 0.00000000 |
| Ne | 5.62337416  | -0.04100750 | 0.00000000 |
| Ne | -4.10981653 | -0.41610286 | 0.00000000 |

**6c**

Free energy = -288.5430356 a.u.

|    |             |             |             |
|----|-------------|-------------|-------------|
| Be | -0.35223470 | -1.24316381 | 0.96766610  |
| Be | 0.35223470  | 1.24316381  | 0.96766610  |
| H  | -0.82645926 | -1.94971657 | 1.95136510  |
| H  | 0.82645926  | 1.94971657  | 1.95136510  |
| H  | 0.00000000  | 0.00000000  | 0.36335910  |
| Ne | -0.14516535 | 2.31660180  | -0.60037090 |
| Ne | 0.14516535  | -2.31660180 | -0.60037090 |

**6d**

Free energy = -288.5416642 a.u.

|    |             |             |             |
|----|-------------|-------------|-------------|
| Be | -1.31006318 | 2.20329614  | 0.00000000  |
| Be | -0.00915217 | 1.14134527  | 0.00000000  |
| H  | 0.07181902  | 2.60265451  | 0.00000000  |
| H  | -1.04797757 | 1.22652525  | 1.02489300  |
| H  | -1.04797757 | 1.22652525  | -1.02489300 |
| Ne | -0.64093289 | -1.95060102 | 0.00000000  |
| Ne | 1.37103264  | 0.10717395  | 0.00000000  |

**7**

Free energy = -1085.042436 a.u.

|    |             |             |             |
|----|-------------|-------------|-------------|
| Be | 0.00000000  | 0.00000000  | 0.84834800  |
| Be | -0.00000000 | 0.00000000  | -0.84834800 |
| H  | 0.00000000  | 1.18149000  | 0.00000000  |
| H  | -1.02320035 | -0.59074500 | 0.00000000  |
| H  | 1.02320035  | -0.59074500 | 0.00000000  |
| Ar | 0.00000000  | 0.00000000  | 2.89460200  |
| Ar | -0.00000000 | 0.00000000  | -2.89460200 |

**7a**

Free energy = -1085.035516 a.u.

|    |             |             |             |
|----|-------------|-------------|-------------|
| Be | 0.00000000  | 0.00000000  | 2.70326594  |
| Be | 0.00000000  | 0.00000000  | 0.71678294  |
| H  | 0.00000000  | 0.00000000  | 4.01030894  |
| H  | -1.07785200 | 0.00000000  | 1.59905094  |
| H  | 1.07785200  | 0.00000000  | 1.59905094  |
| Ar | 0.00000000  | 1.68416400  | -0.58023906 |
| Ar | 0.00000000  | -1.68416400 | -0.58023906 |

**7b**

Free energy = -1085.027365 a.u.

|    |            |            |            |
|----|------------|------------|------------|
| Be | 0.00000000 | 0.84955200 | 0.00000000 |
|----|------------|------------|------------|

|    |             |             |             |
|----|-------------|-------------|-------------|
| Be | 1.31722600  | -0.60162600 | 0.00000000  |
| H  | 0.46068300  | 0.16530800  | 1.09287900  |
| H  | 0.46068300  | 0.16530800  | -1.09287900 |
| H  | 2.62767800  | -0.51028600 | 0.00000000  |
| Ar | 0.51184200  | -2.65815800 | 0.00000000  |
| Ar | -1.00172800 | 2.61304500  | 0.00000000  |

### 7c

Free energy = -1085.026727 a.u.

|    |            |             |             |
|----|------------|-------------|-------------|
| Be | 0.00000000 | 0.00000000  | -4.62197485 |
| Be | 0.00000000 | 0.00000000  | -2.63577785 |
| H  | 0.00000000 | 1.09192000  | -3.48229785 |
| H  | 0.00000000 | 0.00000000  | -5.92702885 |
| H  | 0.00000000 | -1.09192000 | -3.48229785 |
| Ar | 0.00000000 | 0.00000000  | -0.62657285 |
| Ar | 0.00000000 | 0.00000000  | 2.95560815  |

### 7d

Free energy = -1085.002209 a.u.

|    |             |             |             |
|----|-------------|-------------|-------------|
| Be | -1.40395422 | 0.92423267  | 0.62078701  |
| Be | -1.79787551 | 2.43035044  | -0.55138219 |
| H  | -1.19934705 | 1.22609290  | 1.88393493  |
| H  | -2.75579537 | 1.64739347  | -0.00955791 |
| H  | -0.57298845 | 1.86934654  | -0.43519128 |
| Ar | -1.38119519 | -1.07852845 | -0.08245664 |
| Ar | 2.34427574  | 0.06957482  | -0.01292141 |

### 8

Free energy = -5535.452102 a.u.

|    |             |             |             |
|----|-------------|-------------|-------------|
| Be | -0.00000000 | -0.00000000 | 0.85050300  |
| Be | -0.00000000 | -0.00000000 | -0.85050300 |
| H  | 0.00000000  | 1.18123800  | 0.00000000  |
| H  | -1.02298212 | -0.59061900 | 0.00000000  |
| H  | 1.02298212  | -0.59061900 | 0.00000000  |
| Kr | -0.00000000 | -0.00000000 | 3.04665400  |
| Kr | -0.00000000 | -0.00000000 | -3.04665400 |

### 8a

Free energy = -5535.445372 a.u.

|    |             |            |            |
|----|-------------|------------|------------|
| Be | 0.00000000  | 0.00000000 | 1.00420856 |
| Be | 0.00000000  | 0.00000000 | 2.99023110 |
| H  | -1.07538700 | 0.00000000 | 1.89697713 |
| H  | 0.00000000  | 0.00000000 | 4.29793145 |



|    |            |             |             |
|----|------------|-------------|-------------|
| H  | 1.07538700 | 0.00000000  | 1.89697713  |
| Kr | 0.00000000 | 1.84507444  | -0.33430062 |
| Kr | 0.00000000 | -1.84507444 | -0.33430062 |

### 8b

Free energy = -5535.436356 a.u.

|    |             |             |             |
|----|-------------|-------------|-------------|
| Be | -0.36454562 | 0.79755909  | 0.00000000  |
| Be | -1.20573418 | -0.96742822 | 0.00000000  |
| H  | -2.50063557 | -1.20358059 | 0.00000000  |
| H  | -0.60202523 | 0.00191856  | 1.09070600  |
| H  | -0.60202523 | 0.00191856  | -1.09070600 |
| Kr | 0.10621736  | 2.92192881  | 0.00000000  |
| Kr | 0.17116612  | -2.86972826 | 0.00000000  |

### 8c

Free energy = -5535.432767 a.u.

|    |            |             |             |
|----|------------|-------------|-------------|
| Be | 0.00000000 | 0.00000000  | -5.35520680 |
| Be | 0.00000000 | 0.00000000  | -3.37034580 |
| H  | 0.00000000 | 0.00000000  | -6.66087880 |
| H  | 0.00000000 | 1.08947600  | -4.22582680 |
| H  | 0.00000000 | -1.08947600 | -4.22582680 |
| Kr | 0.00000000 | 0.00000000  | -1.21657680 |
| Kr | 0.00000000 | 0.00000000  | 2.60587520  |

### 8d

Free energy = -5535.391334 a.u.

|    |             |             |            |
|----|-------------|-------------|------------|
| Be | -0.60654878 | 1.27418399  | 0.00000000 |
| Be | 5.37251867  | -1.10501036 | 0.00000000 |
| H  | -0.87809338 | 2.54757017  | 0.00000000 |
| H  | 4.09969831  | -0.69876049 | 0.00000000 |
| H  | 6.62455453  | -1.50906235 | 0.00000000 |
| Kr | -2.19122912 | -0.33639816 | 0.00000000 |
| Kr | 1.38817248  | 0.30816367  | 0.00000000 |

### 9

Free energy = -687.9046758 a.u.

|    |             |             |             |
|----|-------------|-------------|-------------|
| Be | 0.00000000  | 0.00000000  | 0.85308900  |
| Be | 0.00000000  | 0.00000000  | -0.85308900 |
| H  | 0.00000000  | 1.18124400  | 0.00000000  |
| H  | -1.02298800 | -0.59062200 | 0.00000000  |
| H  | 1.02298800  | -0.59062200 | 0.00000000  |
| Xe | 0.00000000  | 0.00000000  | 3.23898900  |
| Xe | 0.00000000  | 0.00000000  | -3.23898900 |

**9a**

Free energy = -687.8968934 a.u.

|    |             |             |             |
|----|-------------|-------------|-------------|
| Be | 0.00000000  | 0.00000000  | 3.14241713  |
| Be | 0.00000000  | 0.00000000  | 1.15983013  |
| H  | 0.00000000  | 0.00000000  | 4.45213713  |
| H  | -1.07314700 | 0.00000000  | 2.06295613  |
| H  | 1.07314700  | 0.00000000  | 2.06295613  |
| Xe | 0.00000000  | 2.04370800  | -0.23876887 |
| Xe | 0.00000000  | -2.04370800 | -0.23876887 |

**9b**

Free energy = -687.8883272 a.u.

|    |             |             |             |
|----|-------------|-------------|-------------|
| Be | -0.42825956 | 0.79655106  | 0.00000000  |
| Be | -1.27251358 | -0.96129805 | 0.00000000  |
| H  | -0.66326121 | -0.00728548 | 1.08812500  |
| H  | -2.57953825 | -1.14352570 | 0.00000000  |
| H  | -0.66326121 | -0.00728548 | -1.08812500 |
| Xe | 0.07917937  | 3.10710551  | 0.00000000  |
| Xe | 0.11913828  | -3.07345580 | 0.00000000  |

**9c**

Free energy = -687.8812488 a.u.

|    |            |             |             |
|----|------------|-------------|-------------|
| Be | 0.00000000 | 0.00000000  | -3.87221524 |
| Be | 0.00000000 | 0.00000000  | -5.85581724 |
| H  | 0.00000000 | 1.08634000  | -4.73973124 |
| H  | 0.00000000 | -1.08634000 | -4.73973124 |
| H  | 0.00000000 | 0.00000000  | -7.16250124 |
| Xe | 0.00000000 | 0.00000000  | -1.53228324 |
| Xe | 0.00000000 | 0.00000000  | 2.56106276  |

**9d**

Free energy = -687.8750167 a.u.

|    |             |             |             |
|----|-------------|-------------|-------------|
| Be | -1.21972317 | 3.49321274  | 0.00000000  |
| Be | -1.58253130 | 1.84143327  | 0.00000000  |
| H  | -2.54722746 | 2.97389379  | 0.00000000  |
| H  | -0.81704115 | 2.58967282  | 1.02776899  |
| H  | -0.81704115 | 2.58967282  | -1.02776899 |
| Xe | 2.44130485  | -0.09299026 | 0.00000000  |
| Xe | -2.15629879 | -0.45315462 | 0.00000000  |

**10**

Free energy = -30.82411066 a.u.

|    |             |             |            |
|----|-------------|-------------|------------|
| Be | -0.00000000 | -0.00000000 | 0.83653500 |
|----|-------------|-------------|------------|

|    |             |             |             |
|----|-------------|-------------|-------------|
| Be | -0.00000000 | -0.00000000 | -0.83653500 |
| H  | 0.00000000  | 1.18397309  | 0.00000000  |
| H  | 1.02535077  | -0.59198655 | 0.00000000  |
| H  | -1.02535077 | -0.59198655 | 0.00000000  |

**10a**

Free energy = -30.83405838 a.u.

|    |            |            |             |
|----|------------|------------|-------------|
| Be | 0.00000000 | 0.00000000 | -1.41890300 |
| Be | 0.00000000 | 0.00000000 | 1.41890300  |
| H  | 0.00000000 | 0.00000000 | -2.72156300 |
| H  | 0.00000000 | 0.00000000 | 2.72156300  |
| H  | 0.00000000 | 0.00000000 | 0.00000000  |
